# Supplementary material
Source: publisher figshare collection journal article supplement (https://future-science-group.figshare.com/ndownloader/files/30793519)
Supplement: Supplementary file 1 [file 30793519]

| **Supplementary Table 1. Biochemical parameters after treatments in a rat glioma model** | | | | | | |
| --- | --- | --- | --- | --- | --- | --- |
| Biochemical parameters | CTRL | LNC+ | BZP | BZP-LNC+ | TMZ | TMZ  +  BZP-LNC+ |
| Creatinine  (mg·mL-1) | 0.52 ± 0.03 | 0.56 ± 0.03 | 0.54 ± 0.06 | 0.55 ± 0.05 | 0.54 ± 0.06 | 0.53 ± 0.03 |
| Urea  (mg·dL-1) | 46.14 ± 7.34 | 46.57 ± 4.08 | 42.86 ± 11.51 | 47.57 ± 7.68 | 49.29 ± 5.19 | 39.29 ± 6.97 |
| ALP  (U·L-1) | 330.60 ± 50.01 | 314.90 ± 92.95 | 278.40 ± 62.44 | 288.60 ± 60.85 | 336.60 ± 80.15 | 337.30 ± 94.65 |
| CPK  (U·L-1) | 6742 ± 2763 | 7816 ± 2078 | 6733 ± 2402 | 6408 ± 2560 | 6571 ± 2543 | 6008 ± 2017 |
| ALT  (U·L-1) | 54.43 ± 14.63 | 42.29 ± 16.70 | 46.71 ± 11.70 | 52.86 ± 17.47 | 47.14 ± 4.78 | 40.29 ± 6.40 |
| AST  (U·L-1) | 254.10 ± 86.24 | 269.00 ± 79.93 | 261.40 ± 82.06 | 317.30 ± 95.64 | 270.60 ± 79.04 | 279.10 ± 61.23 |
| *Abbreviations:* alkaline phosphatase (ALP), creatine phosphokinase (CPK), alanine aminotransferase (ALT) and aspartate aminotransferase (AST).  *Notes:* Values are expressed as mean ± S.D. of 7 animals/group to each parameter. | | | | | | |
